# Supplementary material
Source: Springer Nature journal article supplement (https://www.springermedizin.de/resource/supplementary/13223_2014_588_MOESM3_ESM.pdf/9596724)

## Study or Subgroup

Tecklenburg et al. 2007

Cohen et al. 1997

Schachter et al. 1982

## Total (95% CI)

Heterogeneity:  $\text{Chi}^2 = 0.72$ ,  $\text{df} = 2$  ( $P = 0.70$ );  $I^2 = 0\%$

Test for overall effect:  $Z = 6.33$  ( $P < 0.000001$ )

## Mean Difference IV, Fixed, 95% CI

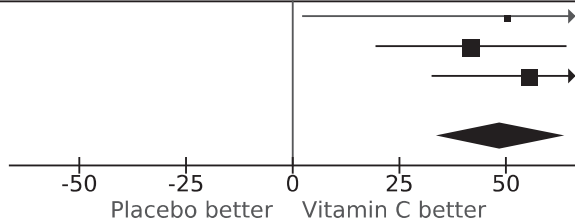

Supplement: MOESM3 [file 9596724]
